# Supplementary material for: Seasonal variations of triple oxygen isotopic compositions of atmospheric sulfate, nitrate, and ozone at Dumont d'Urville, coastal Antarctica
Source: Copernicus journal article supplement (doi:10.5194/acp-17-3713-2017), 2017-03-16
Supplement: Supplementary file 1 [file acp-17-3713-2017-supplement.zip]

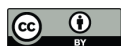

*Supplement of*

**Seasonal variations of triple oxygen isotopic compositions of atmospheric sulfate, nitrate, and ozone at Dumont d'Urville, coastal Antarctica**

**Sakiko Ishino et al.**

*Correspondence to:* Sakiko Ishino (ishino.s.ab@m.titech.ac.jp)

- [acp-17-3713-2017-supplement-title-page.pdf](#)
- [FigureS1.pdf](#)
- [Supplement\\_raw\\_data.xlsx](#)

The copyright of individual parts of the supplement might differ from the CC-BY 3.0 licence.
